# Supplementary material for: Unraveling the Anion Storage Properties of Manganese-Doped SrTiO3
Source: PubMed Central journal article supplement — ACS Omega. 2024 Nov 15;9(47):47332–41. doi: 10.1021/acsomega.4c08911 (PMC11603244; doi:10.1021/acsomega.4c08911), 2024-11-15
Supplement: ao4c08911_si_001.pdf [file ao4c08911_si_001.pdf]

## Supplementary Information

### Unraveling the Anion Storage Properties of Manganese doped SrTiO<sub>3</sub>

Dushyant K. Sharma<sup>1</sup>, Susanta S. Roy<sup>1\*</sup>, Binson Babu<sup>1\*</sup>

<sup>1</sup>Department of Physics, School of Natural Science, Shiv Nadar Institution of Eminence, Uttar Pradesh-201314, India

\*Corresponding authors: [binson.babu@snu.edu.in](mailto:binson.babu@snu.edu.in), [susanta.roy@snu.edu.in](mailto:susanta.roy@snu.edu.in)

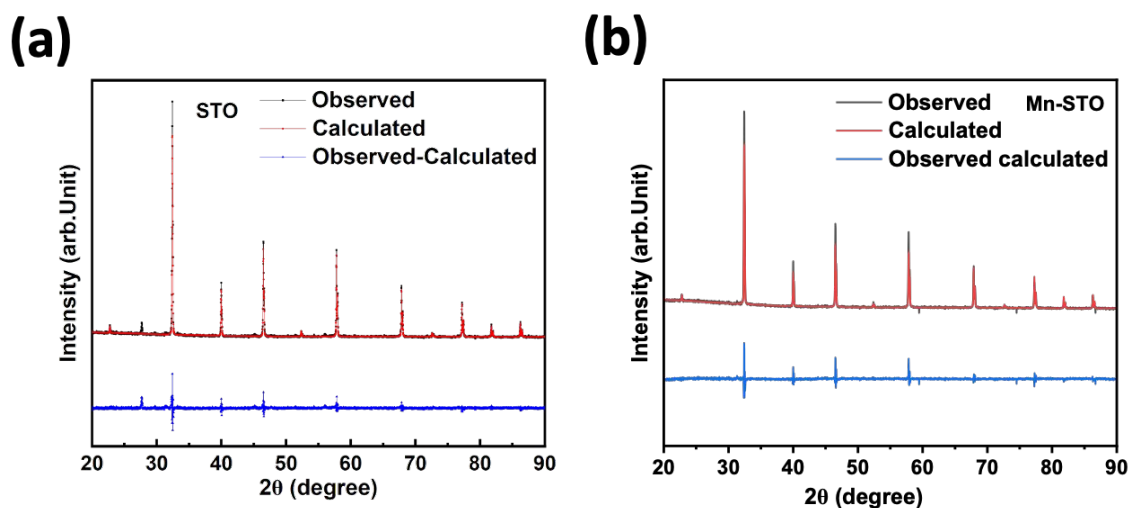

Figure S1. Rietveld refinement of (a) STO and (b) Mn- STO

#### • Calculation of Gold Schmidt tolerance factor

The Gold Schmidt tolerance factor ( $t$ ) of perovskites is calculated by using the following equation,

$$t = \frac{R_a + R_o}{1.414(R_b + R_o)} \quad (S1)$$

Where,

$R_a$  = radius of the “a” cation.

$R_b$  = radius of the “b” cation.

$R_o$  = radius of the oxygen ion.

1) For STO:

$R_a = Sr^{2+} = 0.144$  nm,  $R_b = Ti^{4+} = 0.061$  nm,  $R_o = R_o^{2-} = 0.140$  nm put these values in the equation 1.

$$t = \frac{0.144 + 0.140}{1.414 (0.061 + 0.140)}$$

After solving this we get,

$$t = 0.999$$

2) For Mn-STO:

a) If  $Mn^{4+}$  replaces  $Ti^{4+}$  fully, then  $t$  factor  $SrMnO_3$  will be  
 $R_a = Sr^{2+} = 0.144$  nm,  $R_b = Mn^{4+} = 0.053$  nm,  $R_o = R_o^{2-} = 0.140$  nm put these values in the equation 1. It becomes perfect cubic.

$$t = \frac{0.144 + 0.140}{1.414 (0.053 + 0.140)} = 1.041$$

b) If only 5% of  $Mn^{4+}$  replaces  $Ti^{4+}$ , then  $t$  factor  $SrTi_{0.95}Mn_{0.05}O_3$  will be

$$R_a = Sr^{2+} = 0.144 \text{ nm}, R_{eff} = 0.95 \times R_{Ti^{4+}} + 0.05 \times R_{Mn^{4+}} = 0.95 \times 0.061 + 0.05 \times 0.053 = 0.0606$$

$$t = \frac{R_a + R_o}{1.414(R_{eff} + R_o)} = \frac{0.144 + 0.140}{1.414(0.0606 + 0.140)} = 1.001$$

**Table S1.** Structural parameters of STO and Mn-STO determined by Rietveld refinement.

| STO                                       | Mn-STO                                   |
|-------------------------------------------|------------------------------------------|
| a=3.904197                                | a=3.9016                                 |
| Volume of unit cell=59.511 Å <sup>3</sup> | Volume of unit cell=59.39 Å <sup>3</sup> |
| R- factor =7.50                           | R- factor =7.69                          |
| $\chi^2 = 2.68$                           | $\chi^2 = 2.25$                          |
| $R_{wp} = 15.31$                          | $R_{wp} = 28.2$                          |

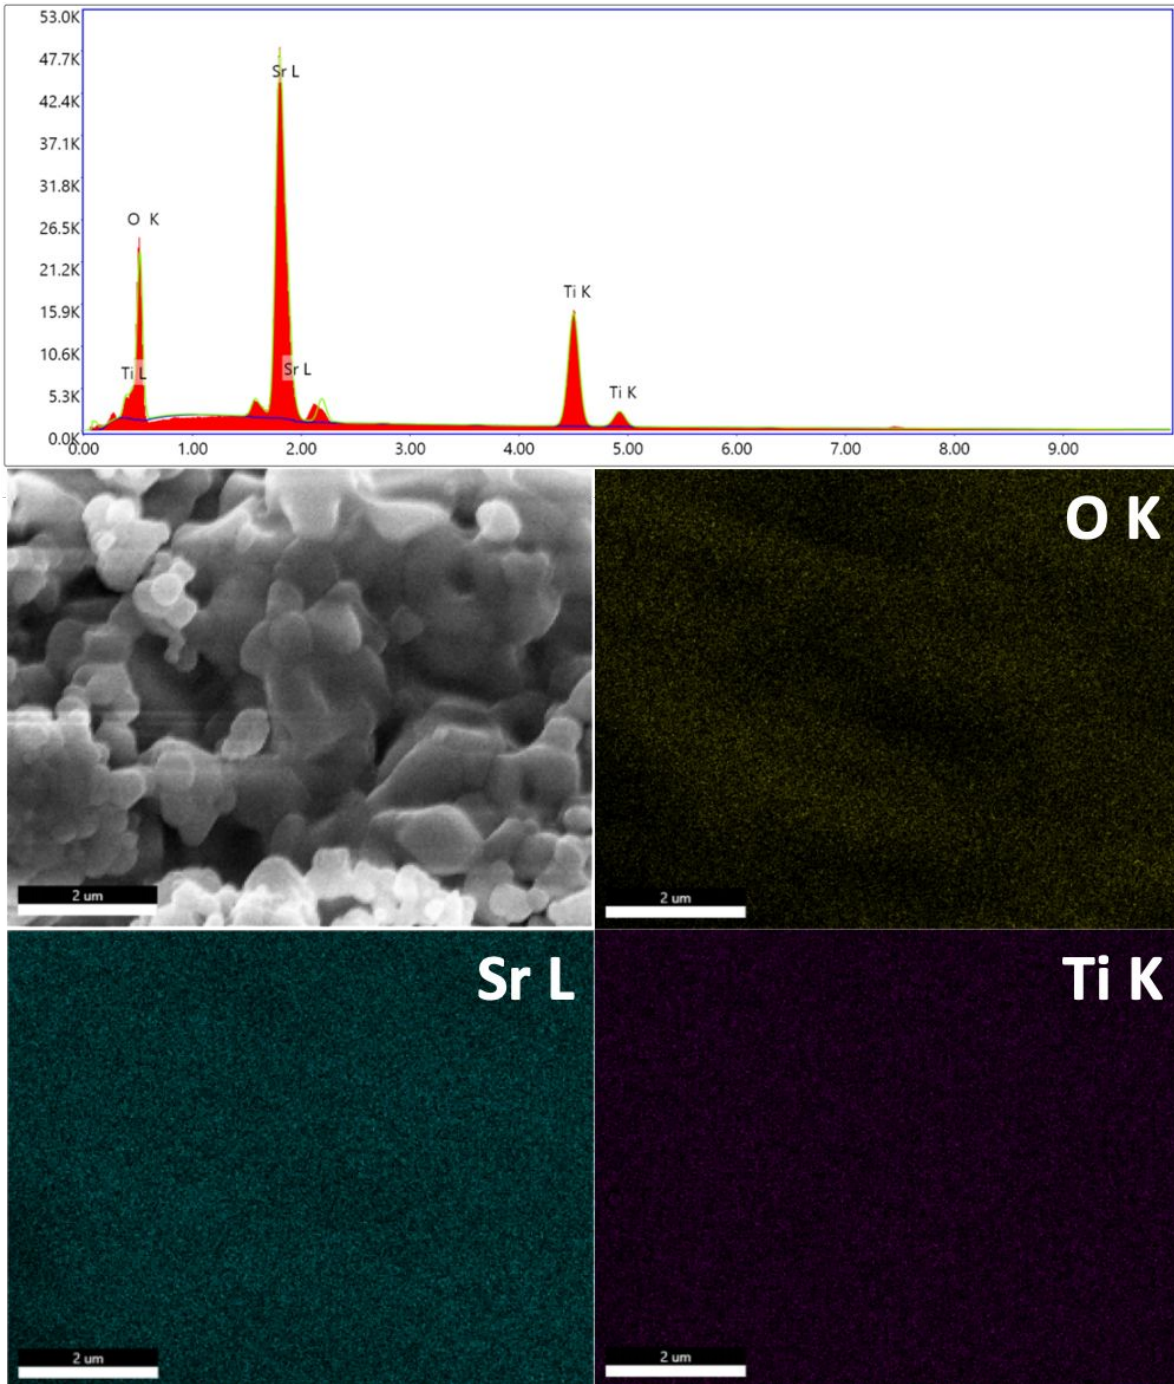

Figure S2. EDAX spectrum and elemental mapping of STO.

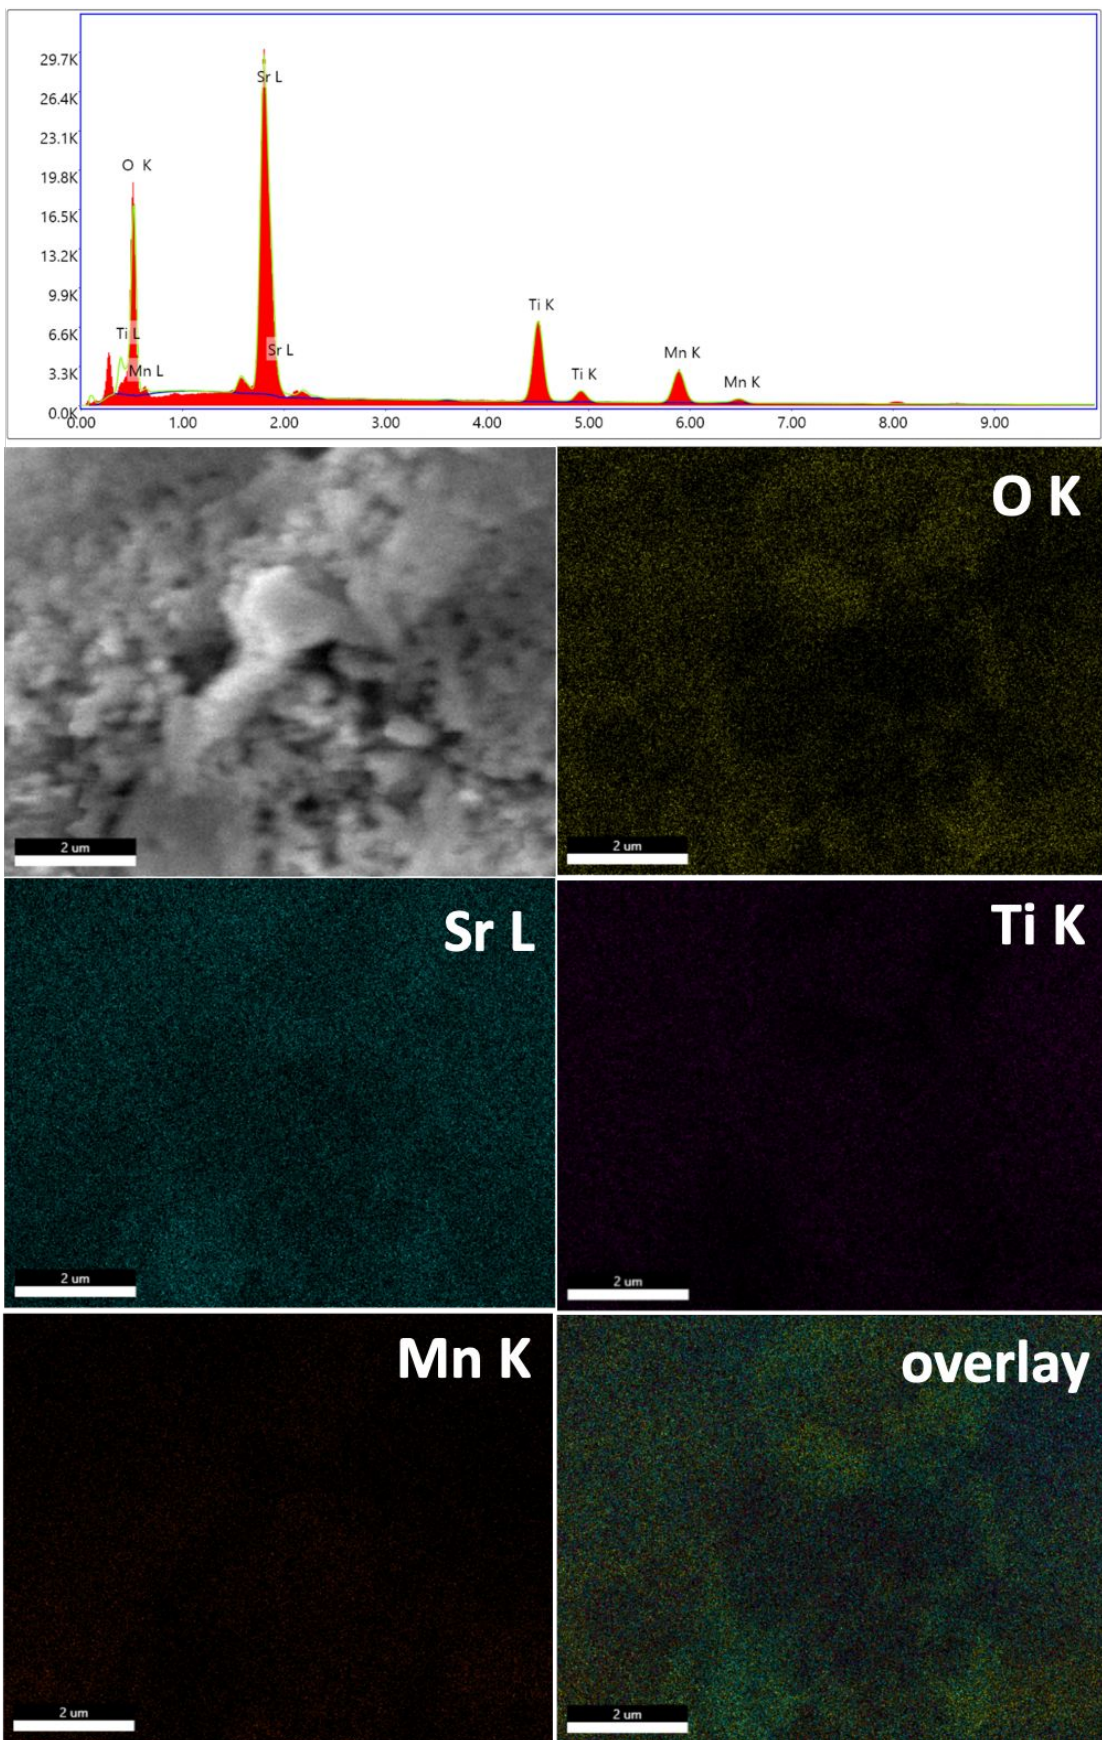

Figure S3. EDAX spectrum and elemental mapping of Mn-STO.

**Table S2.** Atomic percentage obtained from EDX spectroscopy for STO and Mn-STO.

| STO | Atomic percentage (%) | Mn-STO | Atomic percentage (%) |
|-----|-----------------------|--------|-----------------------|
| Sr  | 44.14                 | Sr     | 23.06                 |
| Ti  | 25.44                 | Ti     | 20.64                 |
| O   | 30.41                 | O      | 43.59                 |
|     |                       | Mn     | 12.72                 |

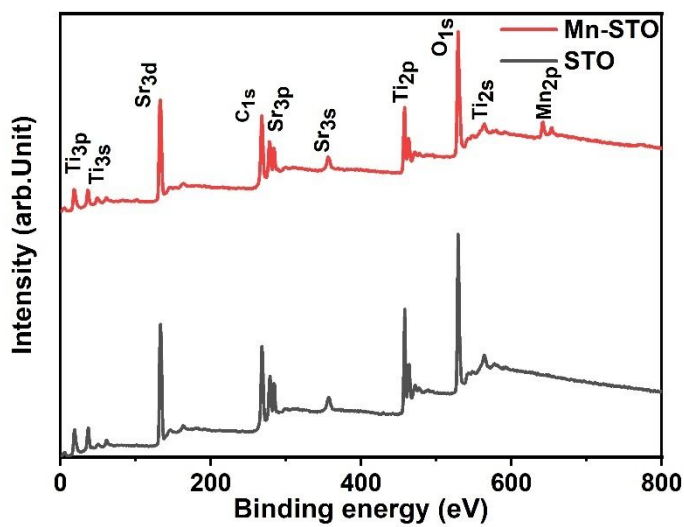

**Figure S4.** XPS Survey Scan of STO and Mn-STO.

**Table S3.** show the binding energy of STO and Mn-STO of XPS spectra.

| <b>Elements</b>     | <b>STO (eV)</b>  | <b>Mn-STO (eV)</b> |        |
|---------------------|------------------|--------------------|--------|
| <b>Sr3d</b>         |                  |                    |        |
| Sr3d <sub>5/2</sub> | 132.58           | 132.02             |        |
| Sr3d <sub>3/2</sub> | 134.28           | 133.75             |        |
| <b>Ti2p</b>         |                  |                    |        |
| Ti2p <sub>3/2</sub> | 457.99           | 457.58             |        |
| Ti2p <sub>1/2</sub> | 463.61           | 463.28             |        |
| <b>O1s</b>          |                  |                    |        |
| O <sup>2-</sup>     | 529.12           | 528.70             |        |
| -OH/O <sub>2</sub>  | 530.04           | 530.27             |        |
| <b>Mn2p</b>         |                  |                    |        |
| Mn2p <sub>3/2</sub> | Mn <sup>3+</sup> | -                  | 641.39 |
|                     | Mn <sup>4+</sup> |                    | 644.64 |
| Mn2p <sub>1/2</sub> | Mn <sup>3+</sup> | -                  | 653.06 |
|                     | Mn <sup>4+</sup> |                    | 654.56 |

- **Calculation of electrochemical surface area (ECSA)**

We use Randle-Sevick's equation to calculate Electrochemical surface area (ECSA) of the electrode material. <sup>1,2</sup>

$$I_p = 2.68 \cdot 10^{-5} n^{3/2} A D^{1/2} C v^{1/2} \quad (S2)$$

where,

$I_p$  = peak current

A = Area (Active area)

D = diffusion coefficient =  $7.2 \cdot 10^{-6}$

C = concentration of electrolyte (5mM) =  $5 \cdot 10^{-3}$  M

$v$  = Scan rate (mVs<sup>-1</sup>)

n = no. of electrons, (n = 1)

After rearranging the equation (1)

$$\frac{I_p}{v^{0.5}} = 2.68 \cdot 10^{-5} \cdot 1 \cdot 7.2 \cdot 10^{-6} \cdot 5 \cdot 10^{-3} \cdot A \quad (S3)$$

Plot graph between scan rate  $V$  ( $\text{mVs}^{-1}$ ) from different CV scans vs current  $I_p$  (mA)

Take the slope from the linear fitting of plot  $I_p$  vs  $V^{0.5}$  from the anodic peak of the CV scan at different scan rates.

Hence,

$$A = \frac{\text{Slope of } I_p}{2.68 \times 10^5 \times 7.2 \times 10^{-5} \times 5 \times 10^{-3} \times 1} \quad (\text{S4})$$

Hence from equation (3) we can calculate the Electrochemical surface area.

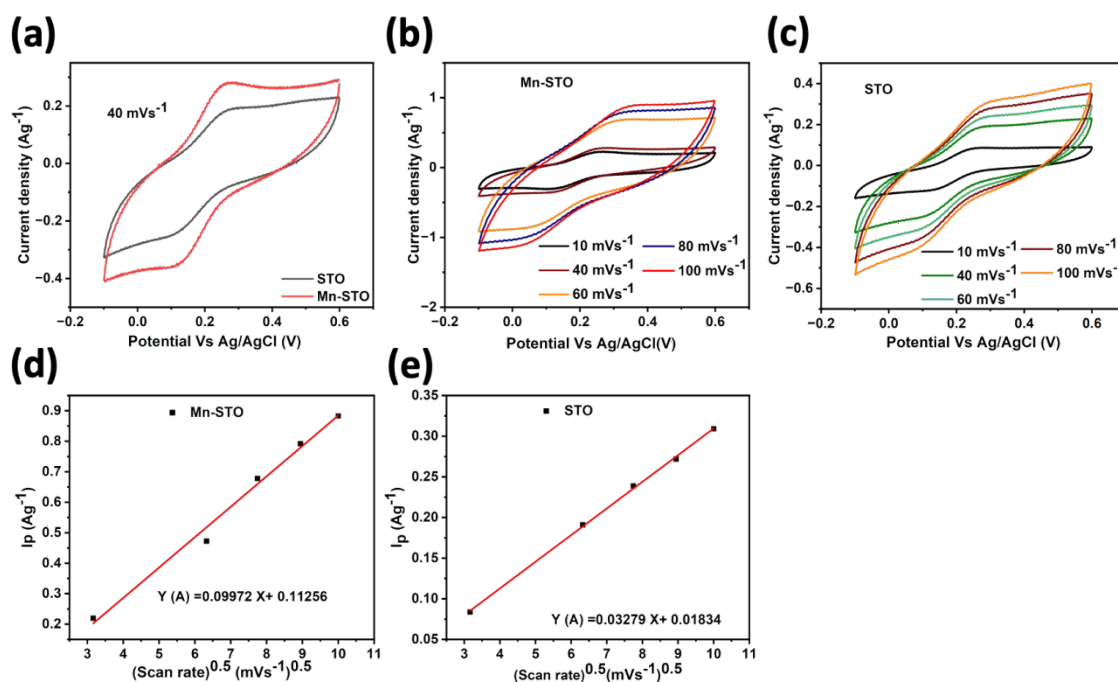

**Figure S5.** Cyclic voltammetry (a) comparing the STO and Mn-STO at 40  $\text{mV s}^{-1}$ , at different scan rates for (b) Mn-STO and (c) STO using standard redox-active electrolyte 0.1 M KCl containing  $5 \times 10^{-3}$  M  $\text{Fe}(\text{CN})^{3-/4-}$ , (d) and (e) displays the linear fitting of the Mn-STO and STO for finding the slope to calculate the electrochemical active surface area using Randle-Sevick's equation.

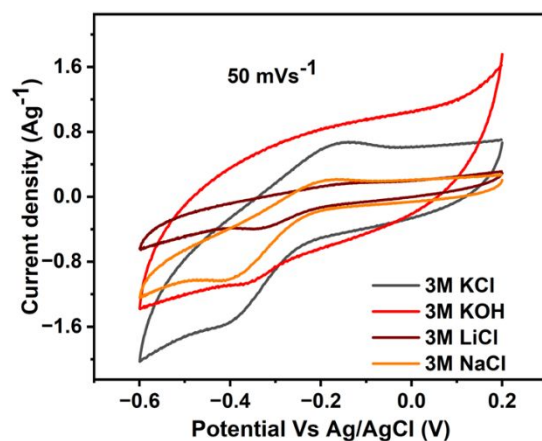

**Figure S6.** Comparison of cyclic voltammetry of pristine STO at  $50 \text{ mVs}^{-1}$  in different electrolytes.

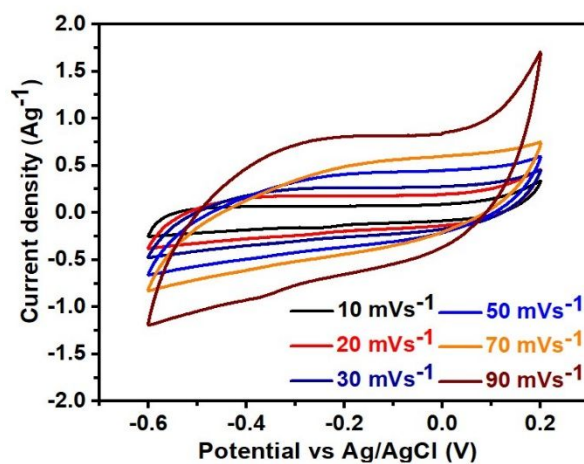

**Figure S7.** Cyclic voltammogram of STO at different scan rates in 3M KOH aqueous solution using the three-electrode setup

- **Calculation of b value:**

The energy storage mechanism can be calculated by using the CV scans at different scan rates according to the following power law<sup>3-5</sup>

$$i = av^b \quad (S5)$$



Where,

$i$  is the scan rate-dependent current.

$\nu$  is the scan rate ( $\text{mVs}^{-1}$ )

$a$  and  $b$  are the adjustable parameters.

$b$  is close to 1 signifies the current is capacitive in nature.

$b$  is close to 0.5 signifying the diffusion-controlled phenomenon.

To determine the  $b$  values,  $\log(i)$  vs.  $\log(\nu)$  was plotted for different constant potentials and the slope of the best linear fit data provides the “ $b$ ” value for each potential for the cathodic and anodic scan respectively.

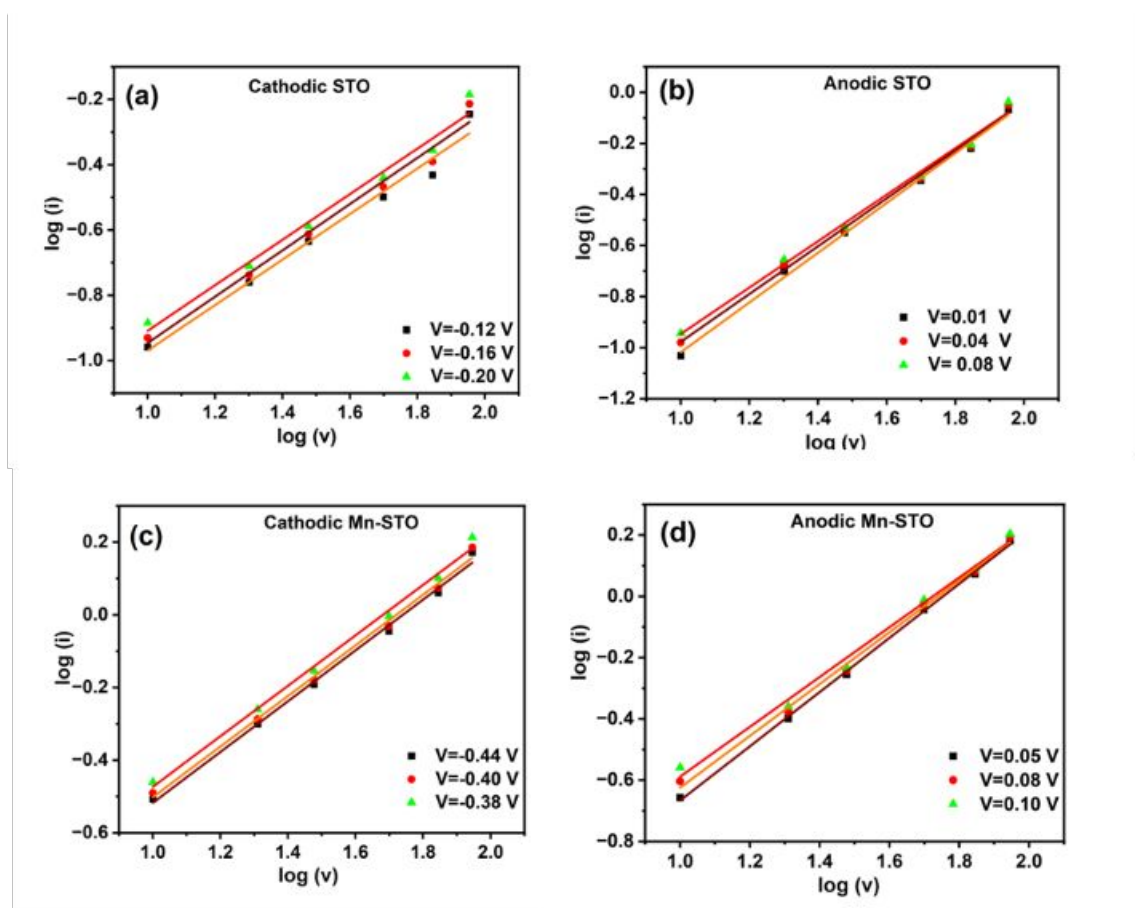

**Figure S8.** (a, b, c, d)  $\log i$  vs “ $\log \nu$ ” plot for STO and Mn-STO respectively. Plot showing the linear relationship of (a, c) cathodic (b, d) anodic sweep of cyclic voltammogram at the different potential.

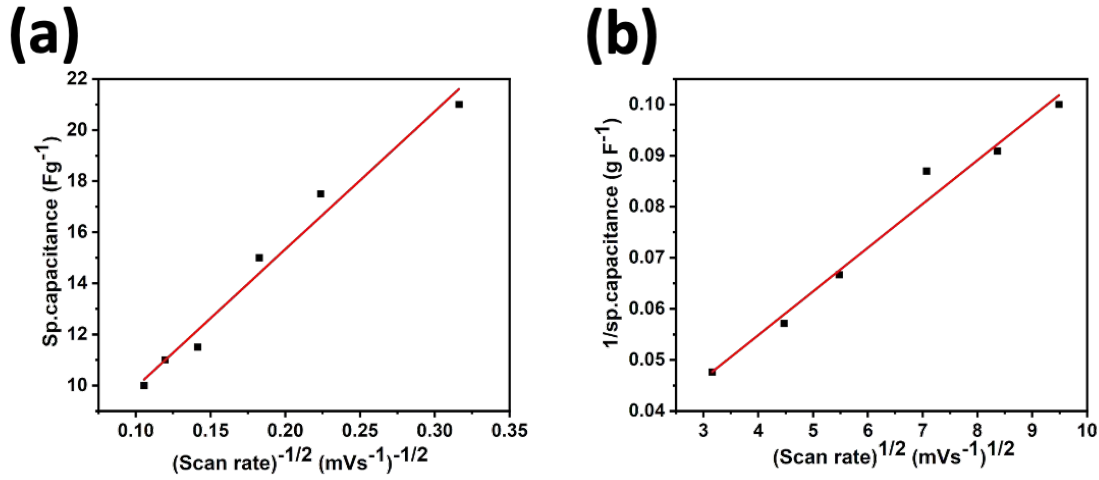

**Figure S9.** Trasatti's method for STO electrode for (a) specific capacitance vs. inverse of scan rate and (b) inverse specific capacitance vs. square root of scan rate.

- **Calculation of diffusion and non-diffusion controlled current contribution:**

To obtain the electrochemical kinetics of charge storage in the material the respective contributions are quantitatively distinguished, as diffusion and non-diffusion limited component.<sup>6-8</sup>

$$I(V) = K_1v + K_2v^{1/2} \quad (S6)$$

Where,

$K_1v$  = are the current contributions due to non-diffusion charge storage.

$K_2v^{1/2}$  = diffusion-controlled intercalation processes.

$v$  = scan rate.

By rearranging the equation. (5), we get

$$\frac{I(v)}{v^{0.5}} = k_1v^{0.5} + K_2 \quad (S7)$$

Plot graph between  $\frac{I(v)}{v^{0.5}}$  VS  $v^{0.5}$ , from the linear fit of the graph, Slope and intercept of the straight line will give the value of  $K_1$  and  $K_2$  respectively. After finding the values

of  $K_2$  at constant potentials  $V$ . Suppose we are taking the scan rate at  $30 \text{ mVs}^{-1}$  take current and voltage as x-axis and y-axis respectively.

Plot the graph between

$X_1$  = value of different constant voltage

$Y_1$  =  $K_2$  values at different constant voltage.

$X_2$  = Voltage vs Ag/AgCl (V) ↓ At  $10 \text{ mVs}^{-1}$

$Y_2$  = Current density ( $\text{Ag}^{-1}$ ) ↓

After plotting shaded region tells about “non- diffusion controlled” charge storage and from that we can easily calculate percentage of diffusion and non-diffusion controlled the charge storage.

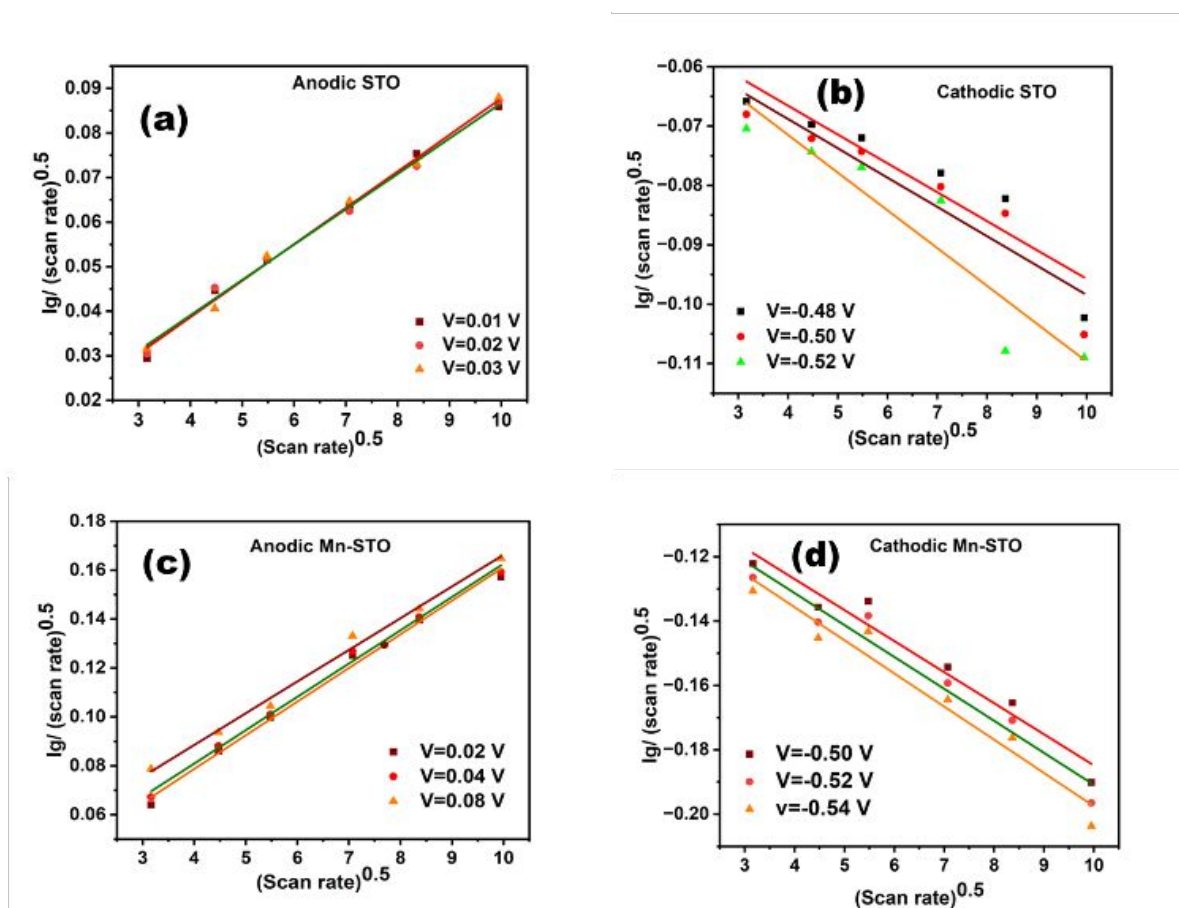

**Figure S10.** (a, b, c, d)  $(\text{scan rate})^{0.5}$  vs  $I_g / (\text{scan rate})^{0.5}$  plot for STO and Mn-STO respectively. The slope and intercept of the straight line provide the values of  $K_1$  and  $K_2$ . The plot displays the linear relationship of (a, c) anodic and (b, d) cathodic sweep of cyclic voltammogram at different potentials.

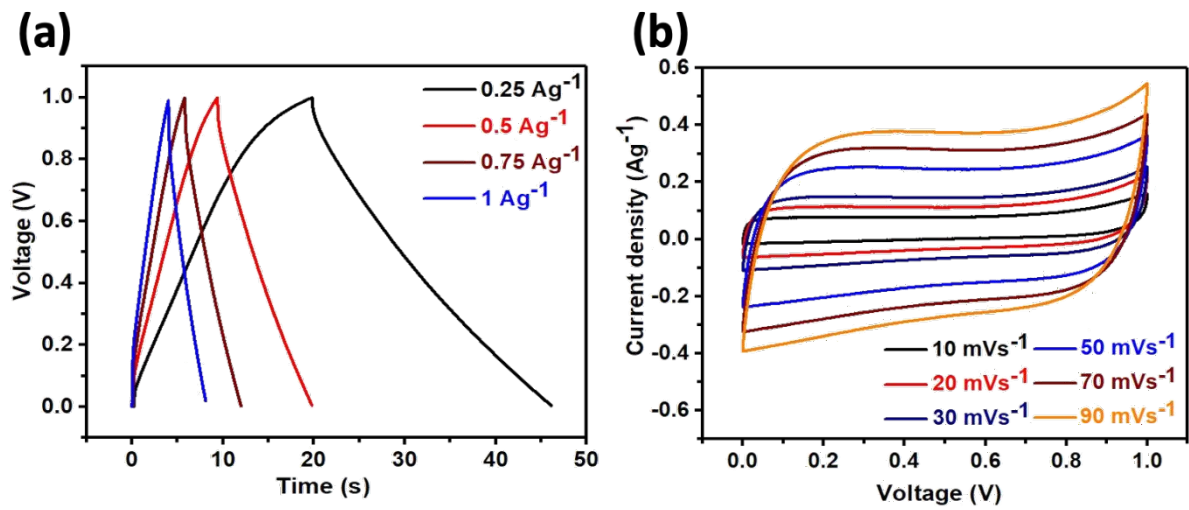

**Figure S11.** (a) galvanostatic charge-discharge at different current densities and (b) cyclic voltammogram at different scan rates of STO symmetric device in 3M KOH electrolytes.

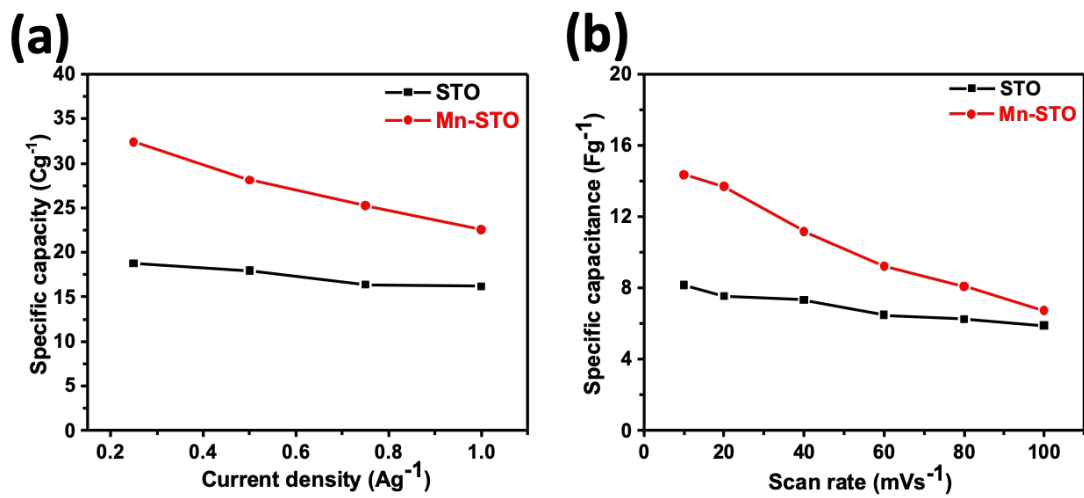

**Figure S12.** Comparison of (a) specific capacity and (b) specific capacitance calculated from the galvanostatic charge-discharge at different current densities and the cyclic voltammetry at different scan rates respectively.

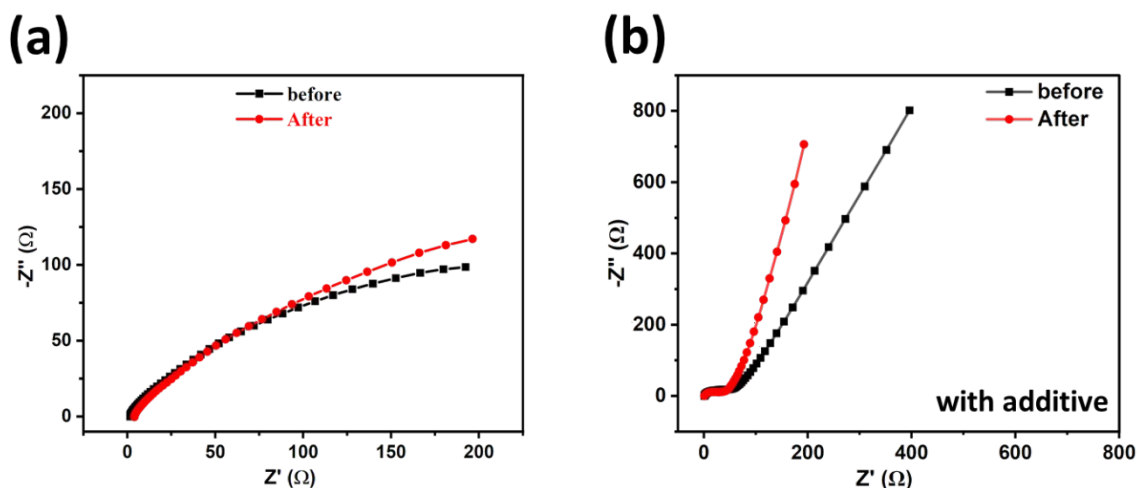

**Figure S13.** The Nyquist plot taken from the electrochemical impedance spectroscopy before and after the cycling stability at a current density of 1.0 A g<sup>-1</sup> of Mn-STO symmetric cell (a) without adding additive and (b) with adding additive 0.1M MnSO<sub>4</sub> in aqueous 3M KOH electrolyte.

## References

- (1) Sharma, D. K.; Sain, S.; Maity, G.; Thomas, A.; Kumar, R.; Dhar, S.; Arora, H. S.; Babu, B.; Roy, S. S. Electrochemical Studies on Chromium Doped SrTiO<sub>3</sub> for Supercapacitor Applications. *Nano Trends* **2024**, *6*, 100036. <https://doi.org/10.1016/j.nwnano.2024.100036>.
- (2) Allen J. Bard, L. R. F. *Electrochemical Methods: Fundamentals and Applications, 2nd Edition*, 2nd ed.; John Wiley & Sons: New York, 2001.
- (3) Babu, B.; Shaijumon, M. M. Studies on Kinetics and Diffusion Characteristics of Lithium Ions in TiNb<sub>2</sub>O<sub>7</sub>. *Electrochim. Acta* **2020**, *345*, 136208. <https://doi.org/10.1016/j.electacta.2020.136208>.
- (4) Babu, B.; Ullattil, S. G.; Prasannachandran, R.; Kavil, J.; Periyat, P.; Shaijumon, M. M. Ti<sup>3+</sup> Induced Brown TiO<sub>2</sub> Nanotubes for High Performance Sodium-Ion Hybrid Capacitors. *ACS Sustainable Chem. Eng.* **2018**, *6* (4), 5401–5412. <https://doi.org/10.1021/acssuschemeng.8b00236>.
- (5) Augustyn, V.; Come, J.; Lowe, M. A.; Kim, J. W.; Taberna, P.-L.; Tolbert, S. H.; Abruña, H. D.; Simon, P.; Dunn, B. High-Rate Electrochemical Energy Storage through Li<sup>+</sup> Intercalation Pseudocapacitance. *Nat. Mater.*, **2013**, *12* (6), 518–522. <https://doi.org/10.1038/nmat3601>.
- (6) Babu, B.; Shaijumon, M. M. Understanding How Degree of Crystallinity Affects Electrochemical Kinetics of Sodium-Ion in Brown TiO<sub>2</sub> Nanotubes. *ChemElectroChem* **2021**, *8* (12), 2180–2185. <https://doi.org/10.1002/celec.202100047>.

- (7) Babu, B.; Shaijumon, M. M. High Performance Sodium-Ion Hybrid Capacitor Based on  $\text{Na}_2\text{Ti}_2\text{O}_4(\text{OH})_2$  Nanostructures. *J. Power Sources* **2017**, *353*, 85–94. <https://doi.org/10.1016/j.jpowsour.2017.03.143>.
- (8) Augustyn, V.; Simon, P.; Dunn, B. Pseudocapacitive Oxide Materials for High-Rate Electrochemical Energy Storage. *Energy Environ Sci.* **2014**, *7* (5), 1597–1614. <https://doi.org/10.1039/C3EE44164D>.
